# Supplementary material for: Optimizing Antimicrobial Efficacy: Investigating the Impact of Zinc Oxide Nanoparticle Shape and Size
Source: MDPI journal article supplement (doi:10.3390/nano14070638), 2024-04-06
Supplement: s1 [file s1]

Supplementary Materials

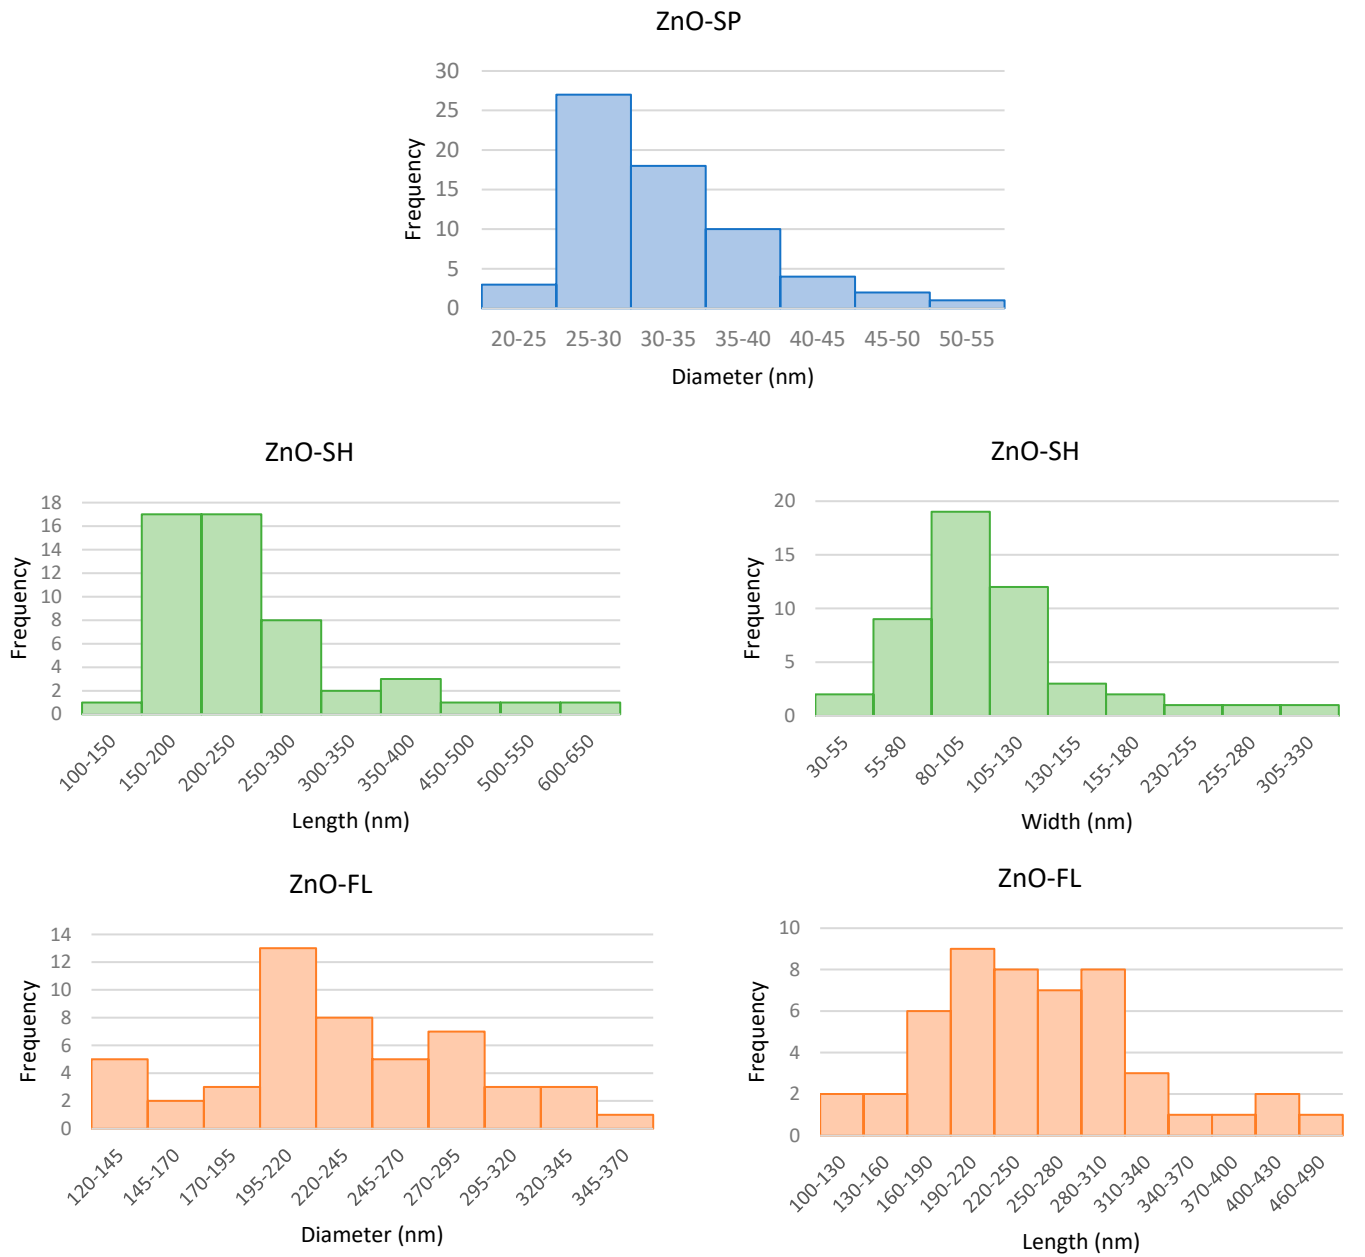

Figure S1. Size distribution of ZnO-SP, ZnO-SH, ZnO-FL.

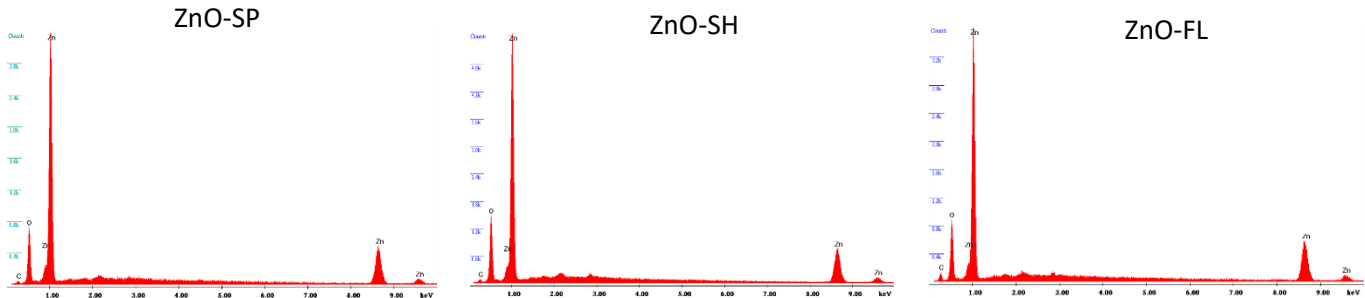

Figure S2. EDS spectra of ZnO-SP, ZnO-SH, ZnO-FL.
